# Supplementary material for: The Grb2 splice variant, Grb3-3, is a negative regulator of RAS activation
Source: PubMed Central journal article supplement (PMC9519967; doi:10.1038/s42003-022-03985-7), 2022-09-28
Supplement: 42003_2022_3985_MOESM2_ESM.pdf [file 42003_2022_3985_MOESM2_ESM.pdf]

**a****i - Grb3-3**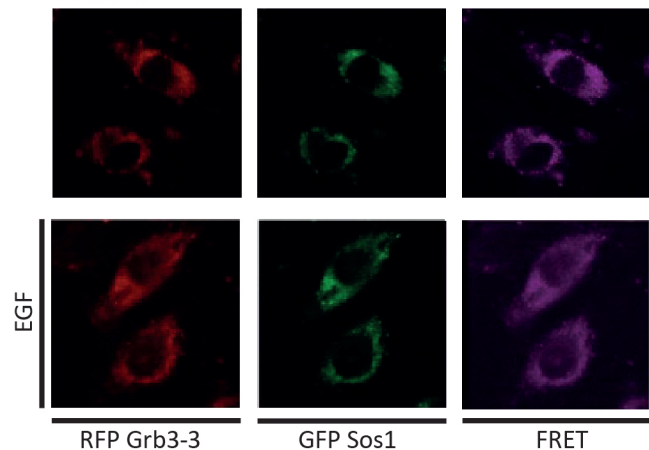**ii - RFP NSH3SH2<sub>40</sub>**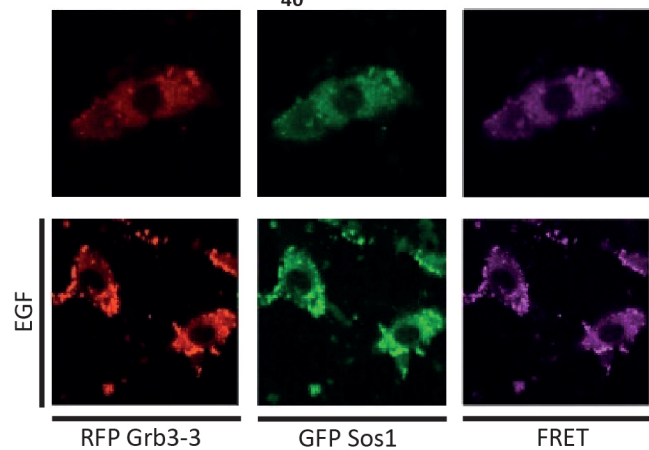**iii - RFP SH2<sub>40</sub> CSH3**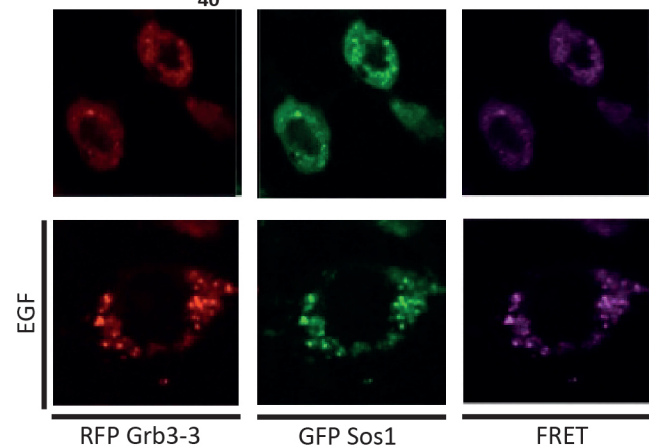**b**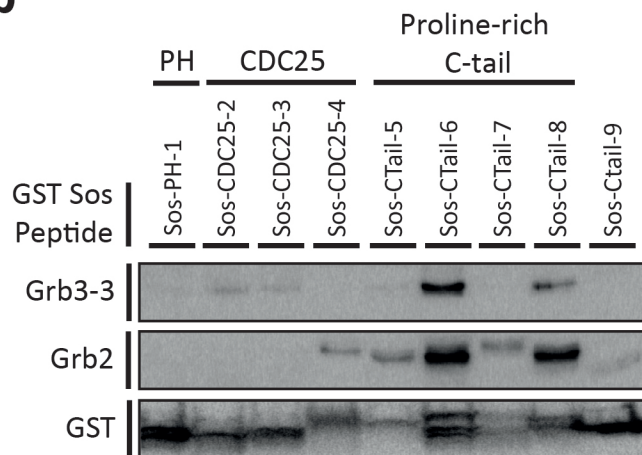**c**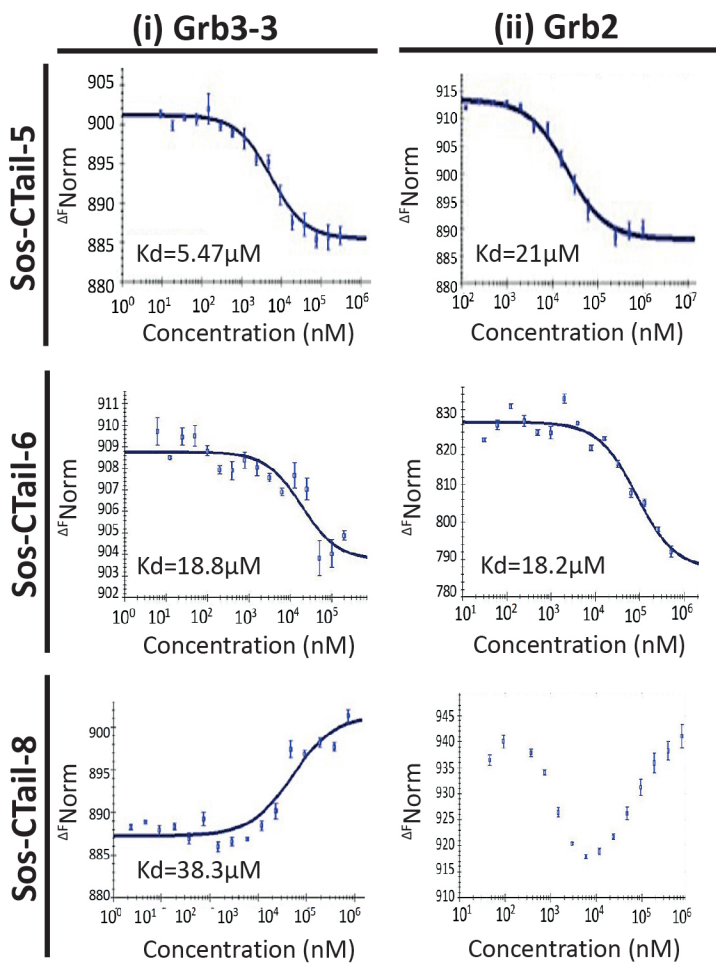

### **Supplementary Figure 1: Grb3-3 associates with the Sos C-terminal tail**

**(a)** Fluorescence resonance energy transfer (FRET) images demonstrating the interaction between Grb3-3 and Sos in HEK293T cells stably transfected with fibroblast growth factor receptor 2 (FGFR2) under conditions of serum-starvation (top panels) and stimulation with epidermal growth factor (EGF). (i) FRET following co-transfection with RFP-tagged full-length Grb3-3 and GFP-tagged Sos. (ii) FRET following co-transfection with truncated RFP-tagged Grb3-3, comprising of its N-terminal SH3 and SH2 domains, (NSH3SH2 $\Delta$ <sub>40</sub>) and GFP-tagged Sos. (iii) FRET following co-transfection with truncated RFP-tagged Grb3-3, comprising of its C-terminal SH3 and SH2 domains (SH2 $\Delta$ <sub>40</sub>CSH3), and GFP-tagged Sos. Control cells transfected with RFP alone showed no FRET (not shown). Scale bar 10 $\mu$ m. **(b)** Western-blot demonstrating binding of purified His-tagged full-length Grb3-3 and full-length Grb2 to GST-tagged proline-rich peptides derived from the Sos C-terminal tail. The domains from which each Sos peptide sequence is derived are shown at the top of the chart (PH, pleckstrin homology). A full list of tail sequences can be found in **Supplementary Table 1**. Sos9 peptide (not included in **Supplementary Table 1**) corresponds to GST alone. Red arrows are used to highlight probable interactions. An interaction between Grb2 and Grb3-3 is seen with Sos-CTail peptides -5, -6 and -8. **(c)** MST measurement of the interaction between purified full-length His tagged (i) Grb3-3 (left column) and (ii) Grb2 (right column) with Sos-CTail proline-rich peptides -5, -6 and -8. Unlabelled peptides (10nM-1mM) were titrated into a fixed concentration (100nM) of labelled Grb2 or Grb3-3. These confirm binding of Grb2 and Grb3-3 to Sos-CTail peptides -5 and -6.

GUGGUUUUUUGGCAAAAUCCCCAGAGCCAAGGCAGAAGAAAUGCUUAGCAAACAGCGGCACGA

ELAVL1

KHDRBS1

SRSF9

SRSF2

hnRNP C

hnRNP G

hnRNPA1

Tra2 alpha

MBNL1

KHDRBS1

KHDRBS3

hnRNP H1,2,3

hnRNPA1

hnRNPE2

SRSF10

ELAVL1

UGGGGCCUUUCUUAUCCGAGAGAGUGAGAGCGCUCCUGGGGACUUCUCCUCUCUGUCA

hnRNPF

ELAVL2

MBNL1

hnRNP I

hnRNP H1,2,3

TIA1

hnRNP I

hnRNP H1,2,3

hnRNPA1

hnRNPF

hnRNP H1,2,3

SRSF5

ELAVL1

**Supplementary Figure 2: Location of consensus sites for splicing factors predicted to bind to *GRB2* exon 4 by SpliceAid2**

An *in silico* analysis using SpliceAid2 with the sequence for *GRB2* exon 4 as input revealed a number of potential transcription factors predicted to bind *GRB2* exon 4. A majority were predicted to bind early in the exon sequence. Putative transcription factor binders are aligned against the sequence to which they were predicted to bind.

**a**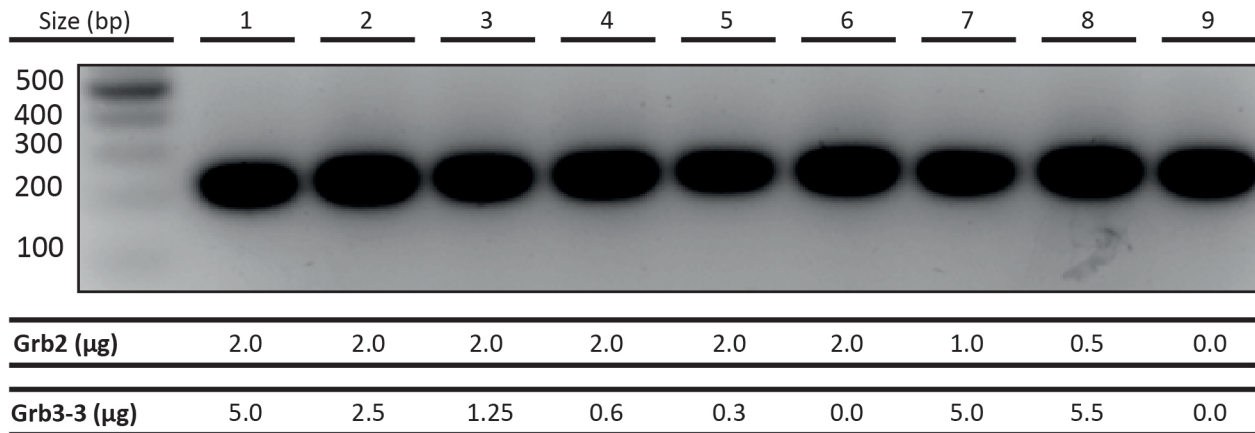**b**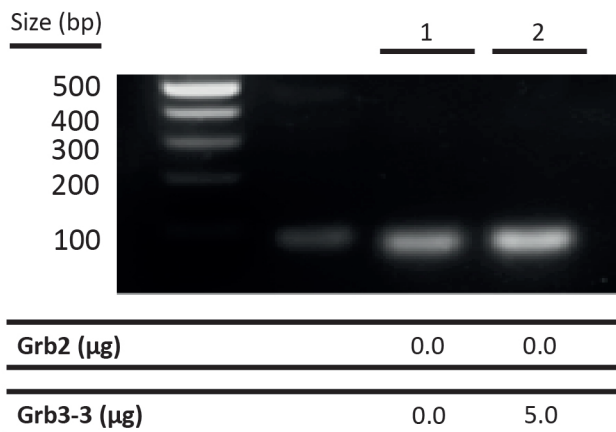

**Supplementary Figure 3: Determining the specificity of isoform-specific sensitive primers for the splice-sensitive Grb2/Grb3-3 qRT-PCR assay.**

Agarose gel electrophoresis was used to determine primer specificity for the splice-sensitive Grb2/Grb3-3 qRT-PCR assay, and to ensure there was no cross-reactivity between the two primer transcripts or mis-priming of non-specific genes. **(a)** To assess the specificity of the Grb3-3 primer pair, HeLa cells were transfected with 0-5 $\mu$ g exogenous Grb3-3 cDNA prior to RNA extraction. Although endogenous Grb2 expression is recognised in HeLa cells, co-transfection with 0-2.0 $\mu$ g Grb2 was undertaken prior to RNA extraction to ensure no cross-reactivity under conditions in which Grb2 concentration is high. Grb3-3 primers were used and the PCR product run via agarose gel electrophoresis. In all samples, a single band was produced between 200 and 300 base pairs (bp) in size, corresponding to the expected amplicon size of 223bp for the Grb3-3 primers. This band was seen in all samples, including those not transfected with exogenous Grb3-3 cDNA, indicating that the primers are sensitive enough to detect endogenous levels of the Grb3-3 transcript. The PCR fragment from sample 9, corresponding to endogenous Grb3-3, was gel extracted, cloned into a TA vector and sequenced confirming that the PCR product produced was Grb3-3. **(b)** To assess the specificity of Grb2-specific primers, the Grb2 primer pair was used to generate a PCR product from RNA extracted from HeLa cells. Given the known endogenous Grb2 expression in HeLa cells, no exogenous Grb2 cDNA was transfected prior to RNA extraction. In order to ensure there was no cross-reactivity with Grb3-3, one sample was transfected with 5 $\mu$ g of Grb3-3 cDNA. A single band was produced in both samples, indicating no cross reactivity. The band observed is less than 100 base pairs in size, corresponding to the expected amplicon size for the Grb2

primers of 76bp. Sequencing of the PCR product following gel extraction confirmed that the product was Grb2 mRNA.

Figure 1a

pERK

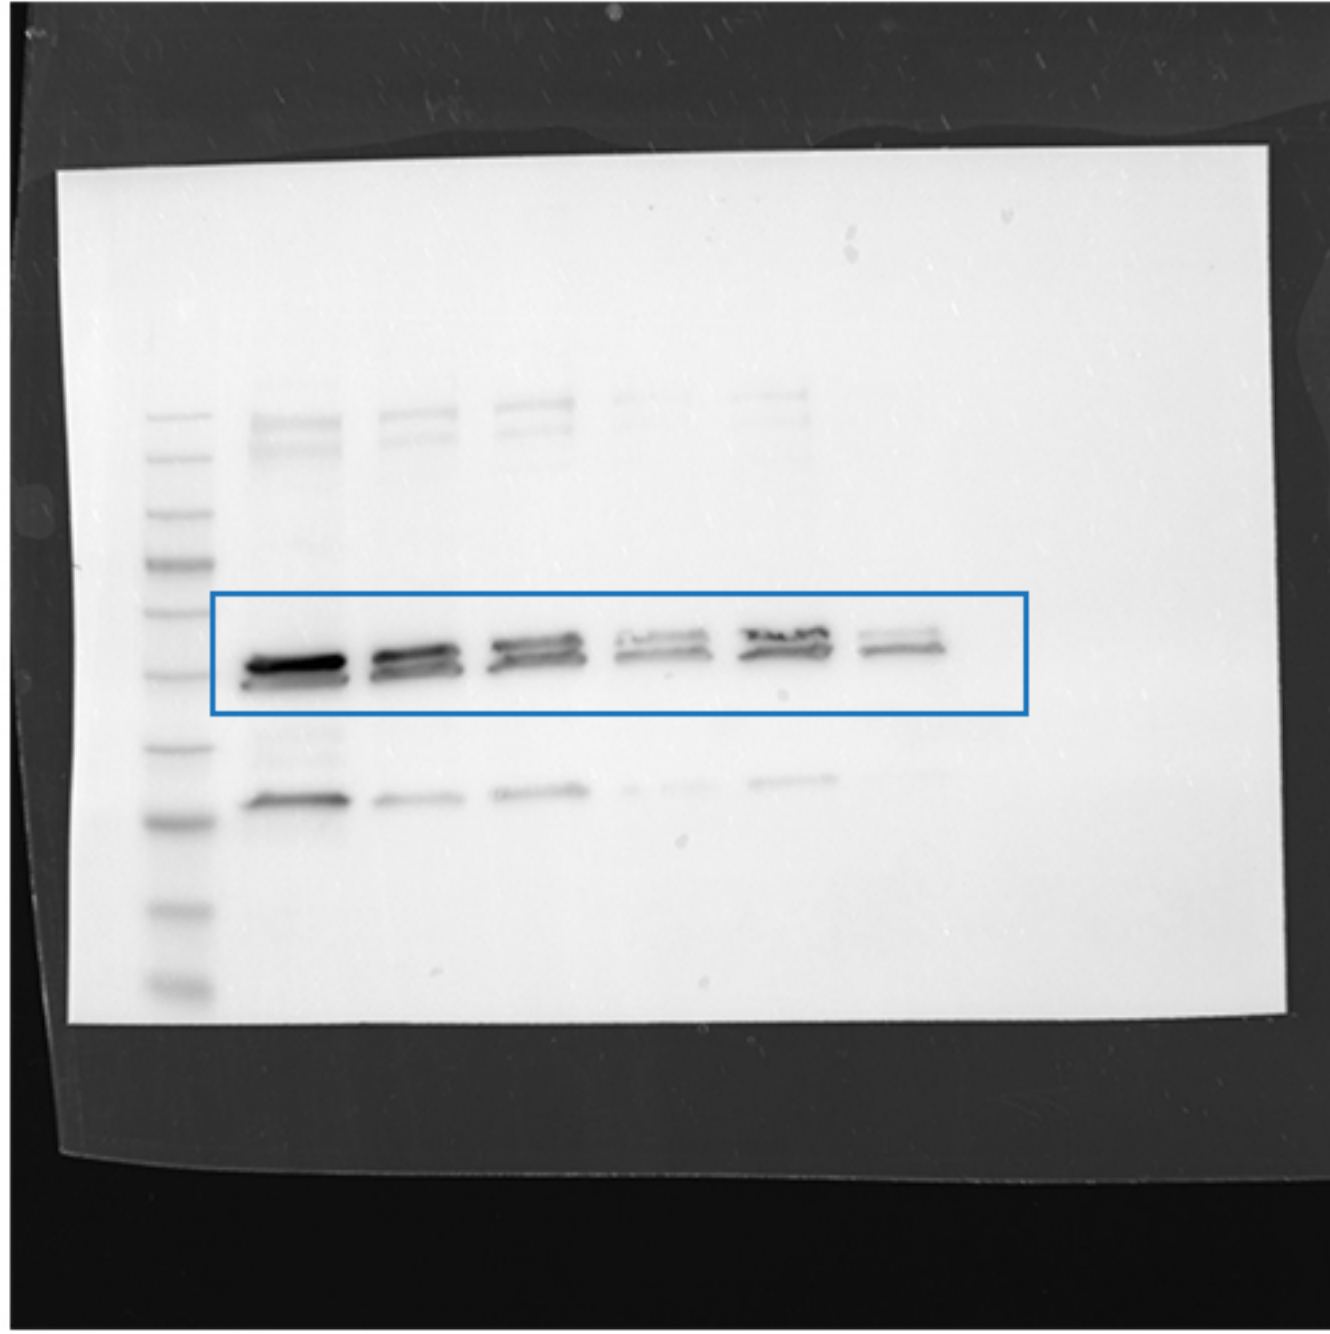

ERK

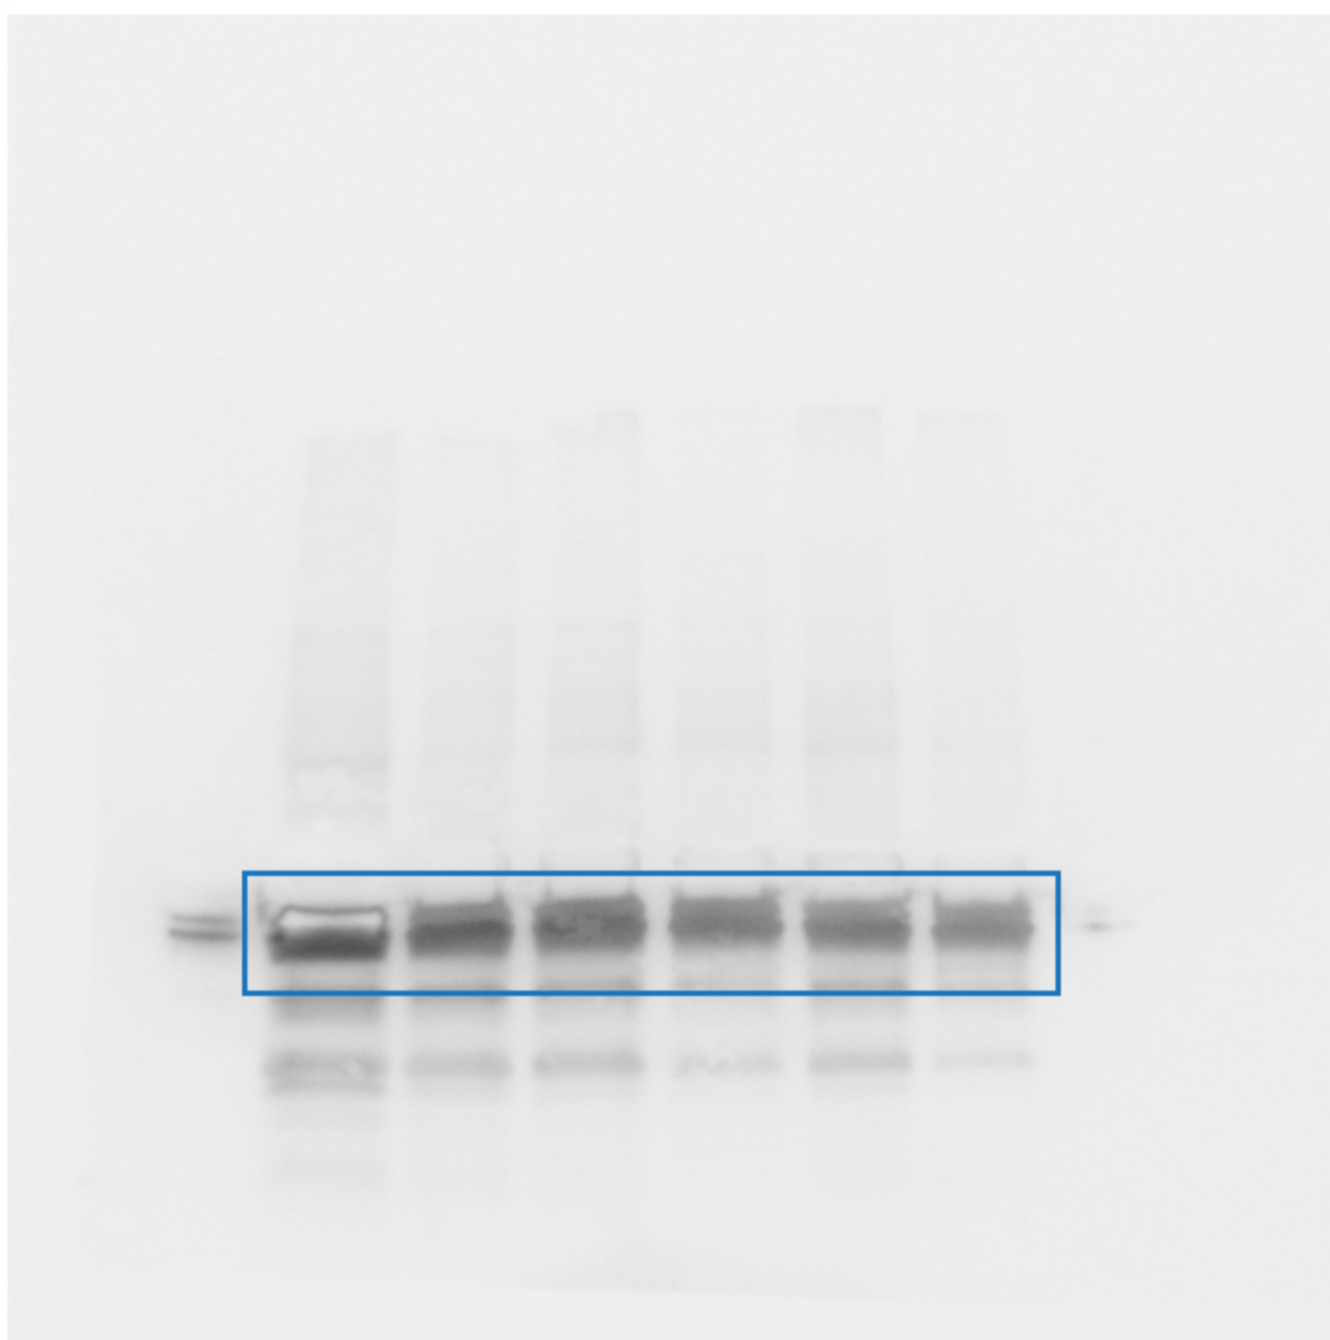

$\alpha$ -Tubulin

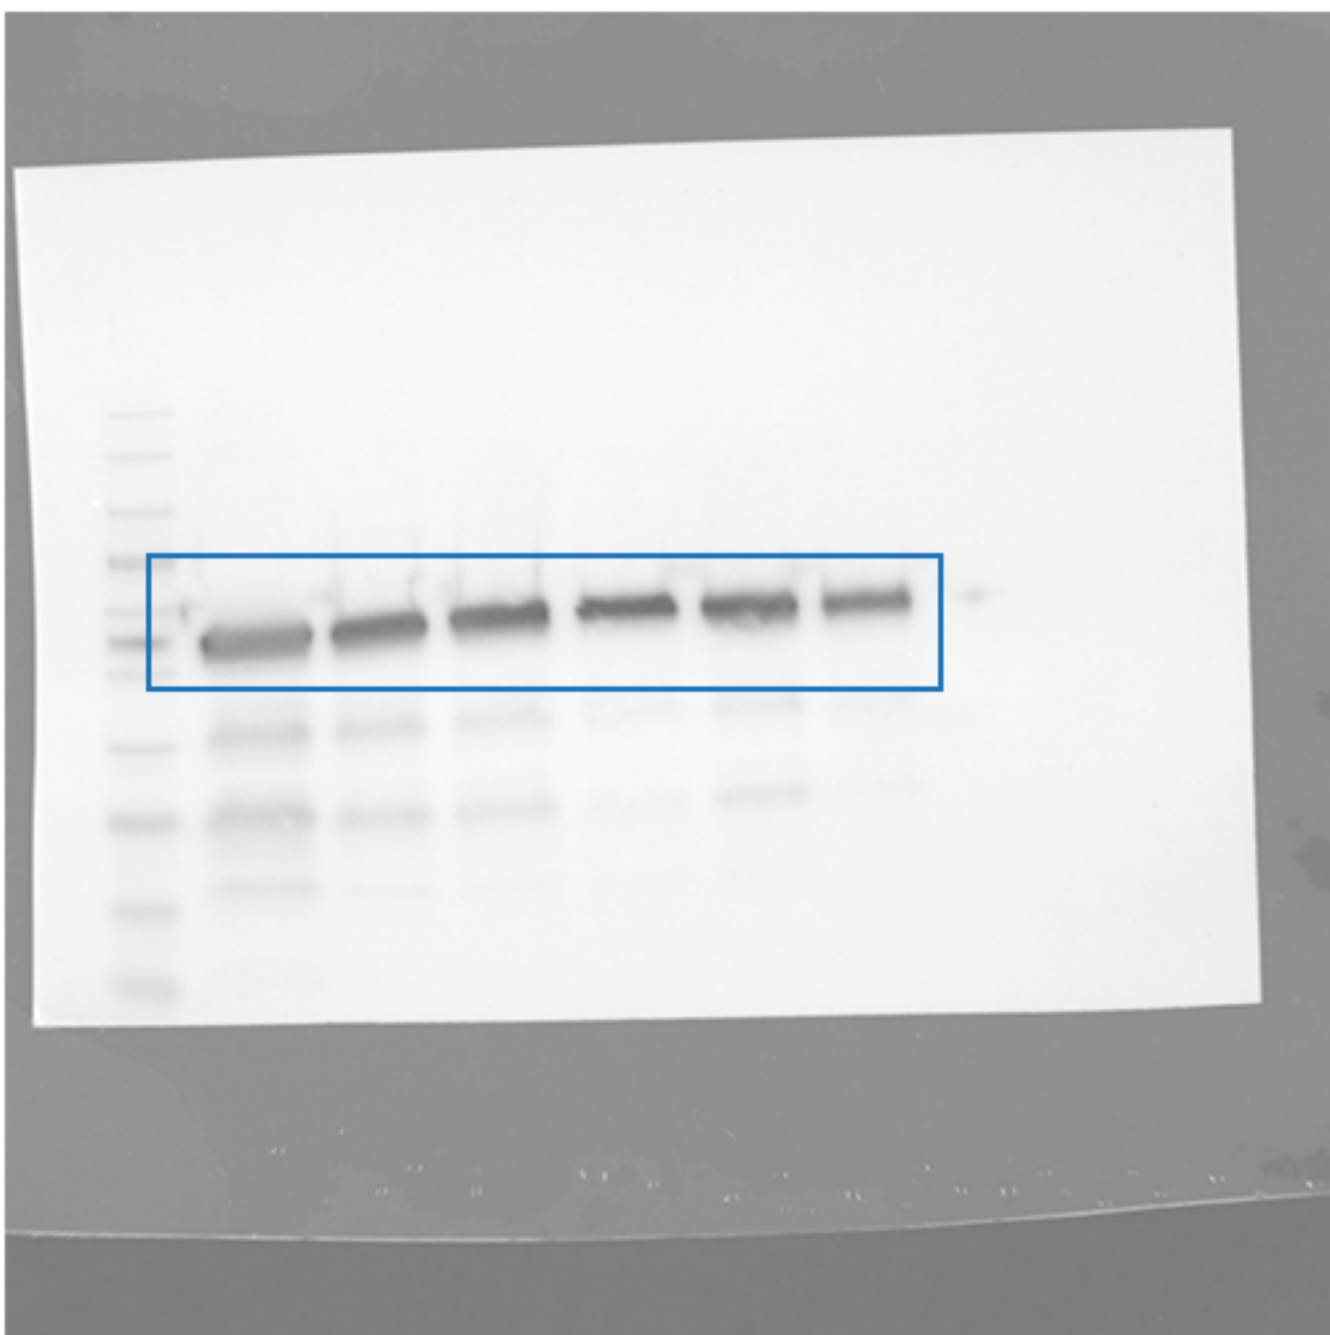

Figure 1c

pEGFR

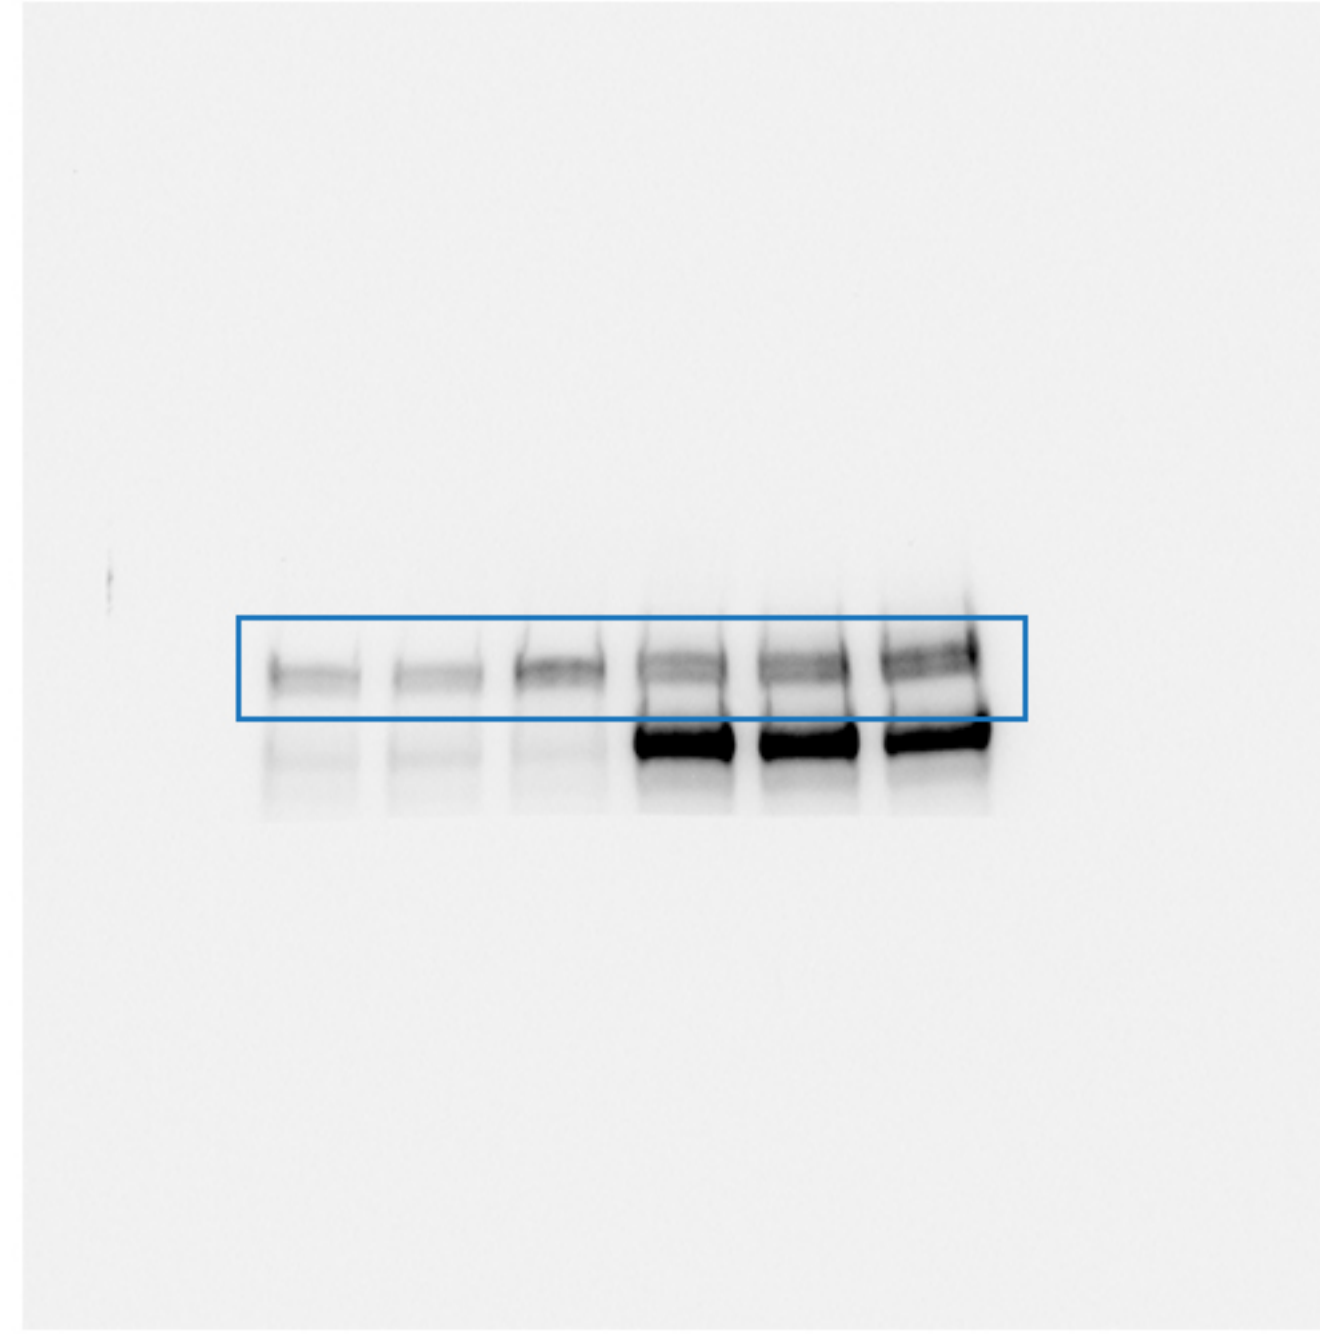

pERK

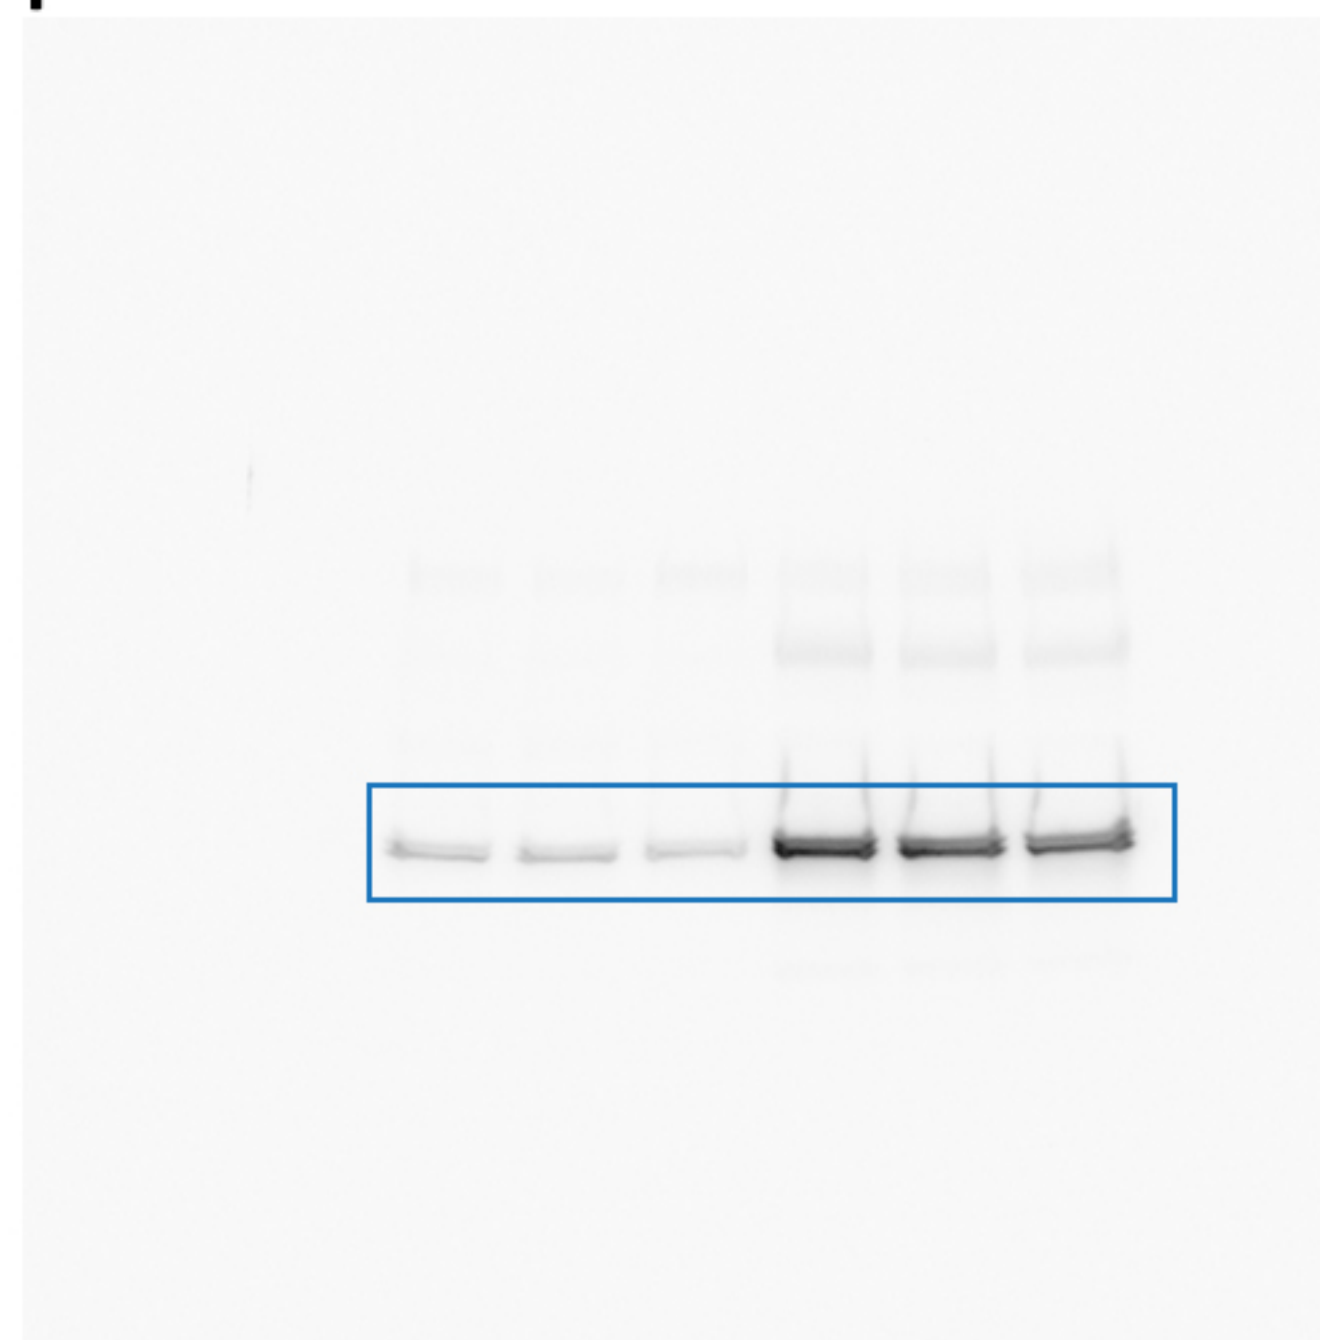

EGFR

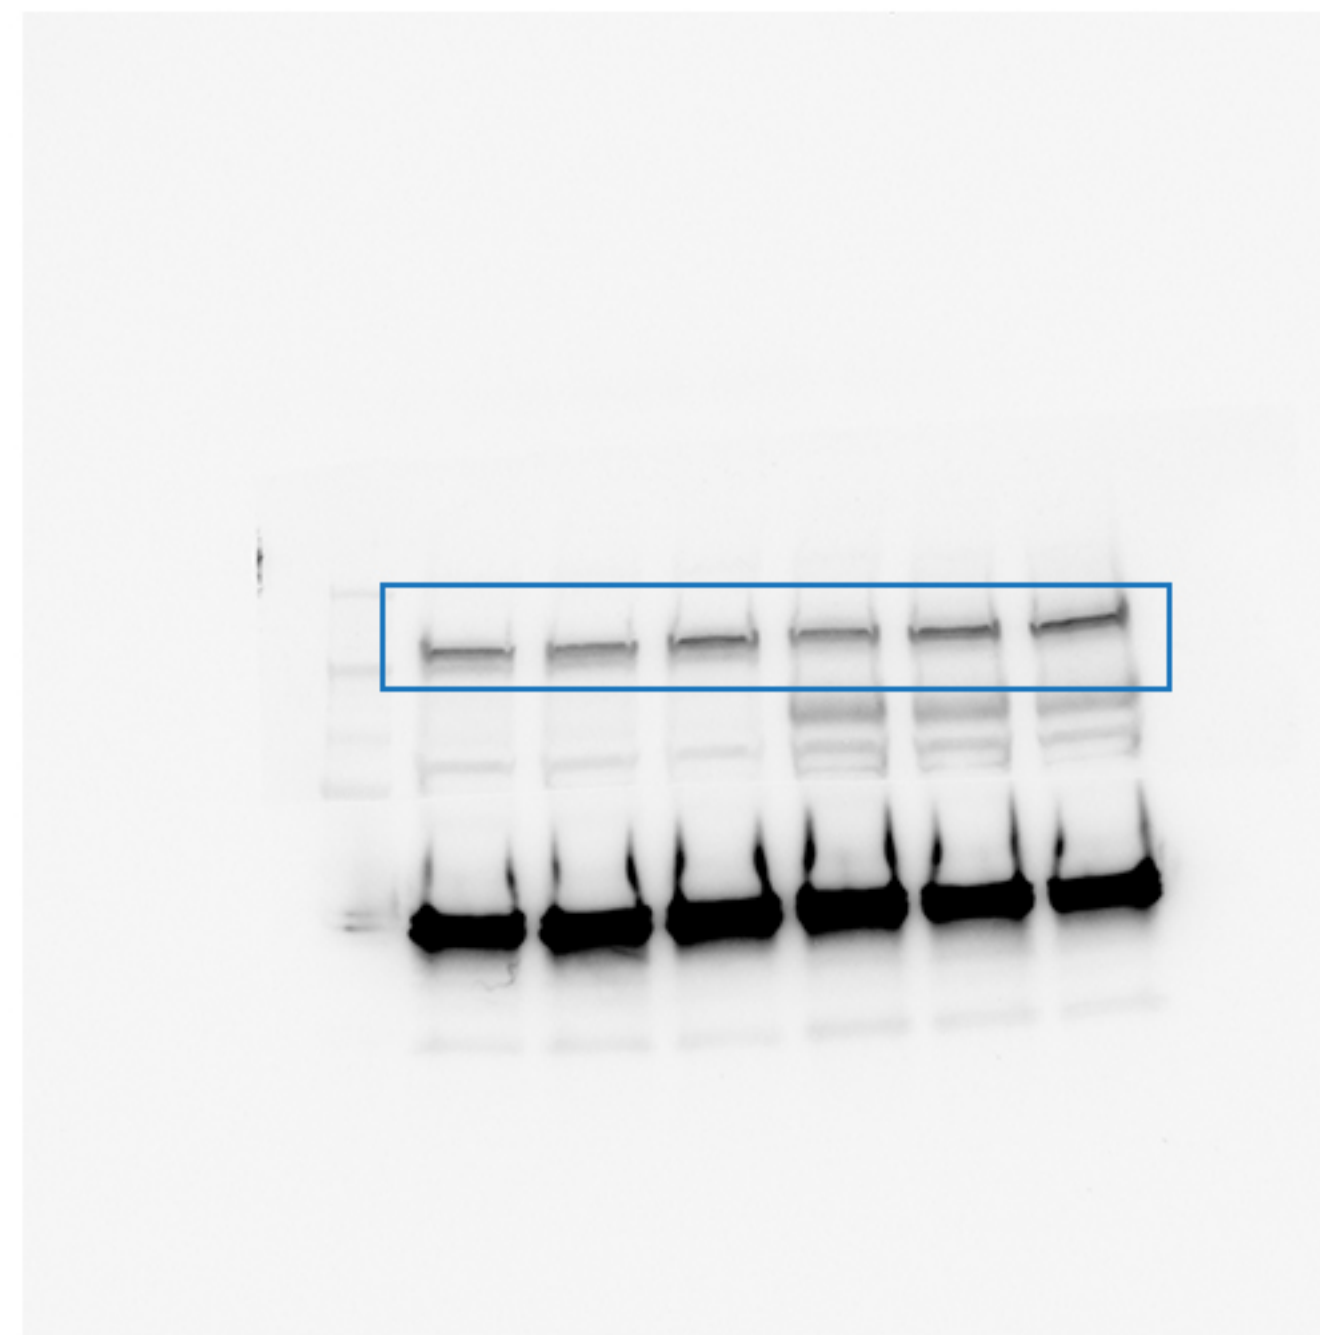

ERK

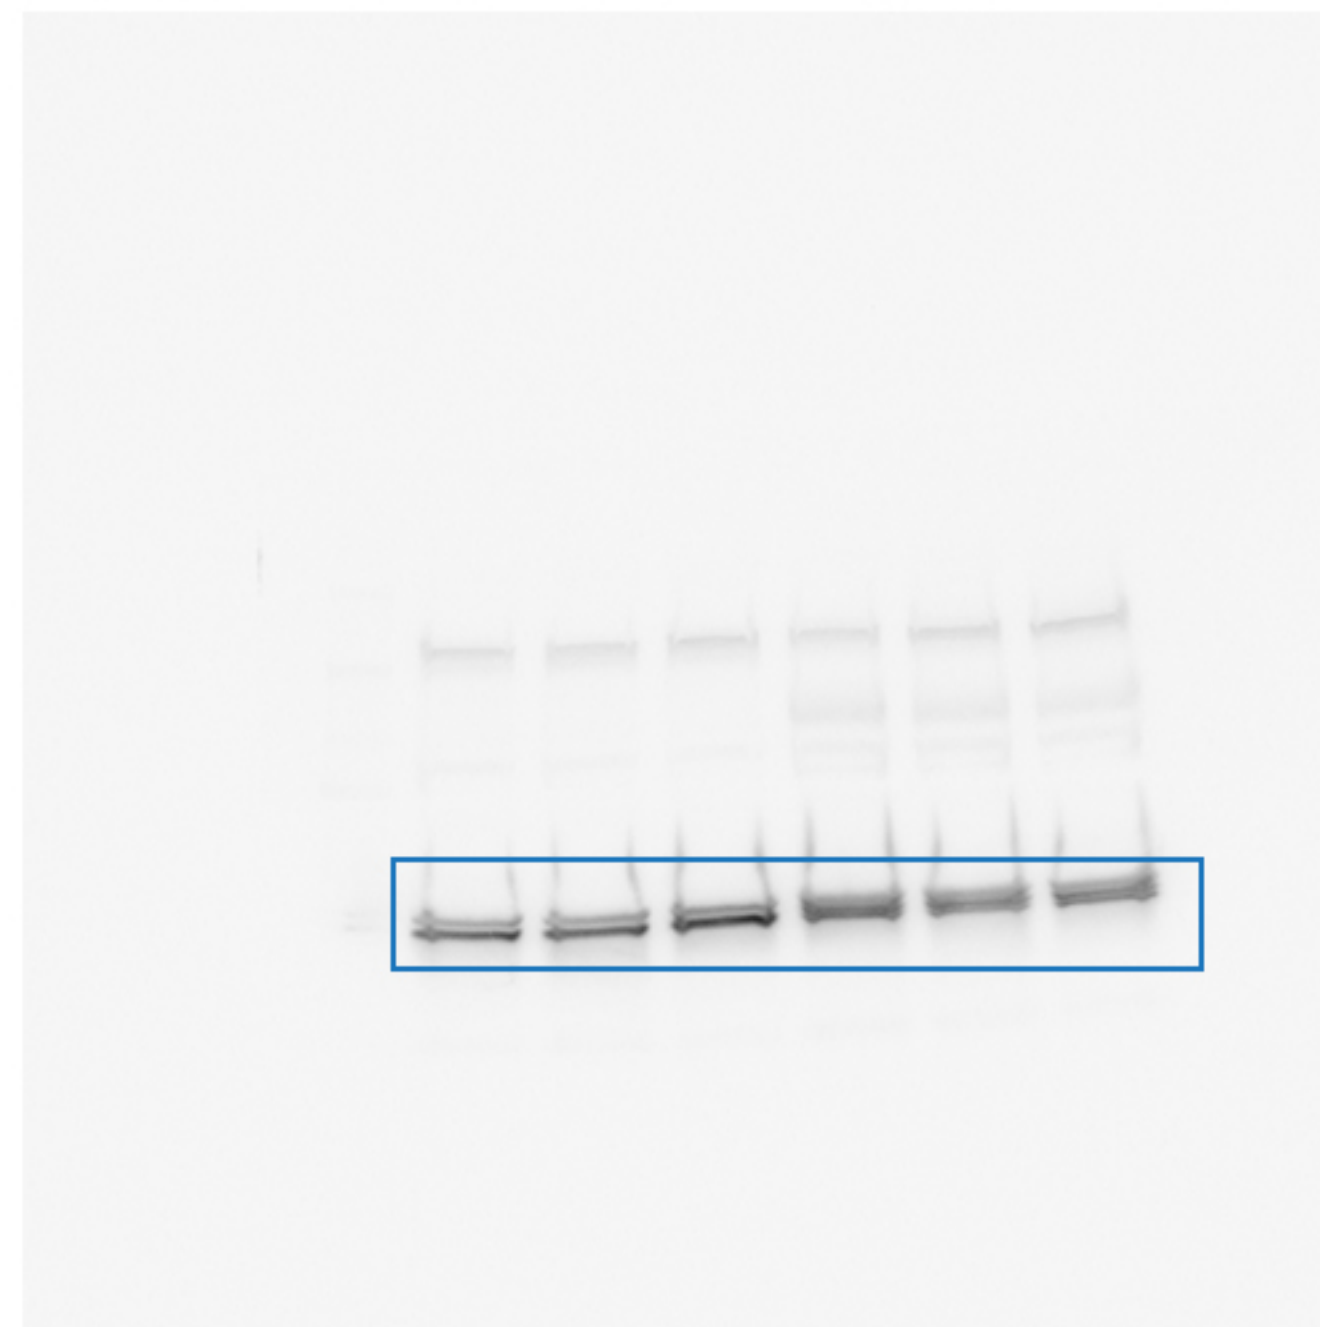

$\alpha$ -Tubulin

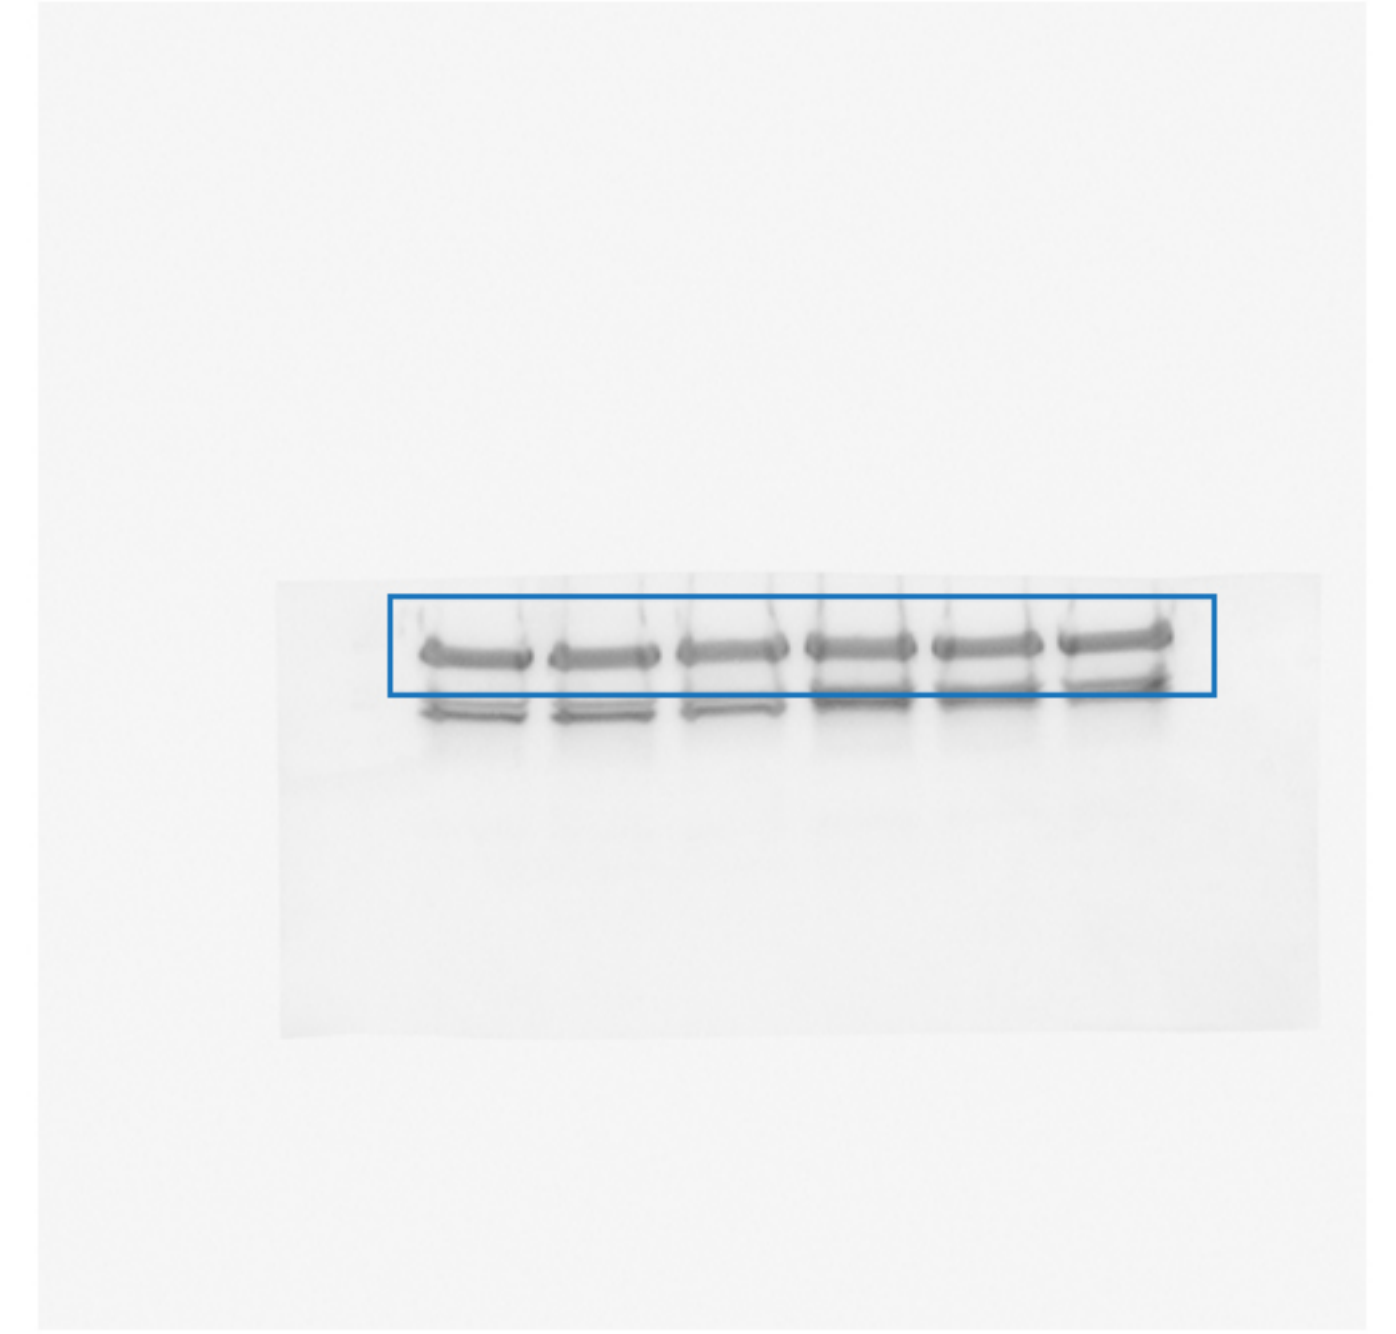



**Supplementary Figure 4: Uncropped and unprocessed Western blots for Figure 1.**

Uncropped Western blots shown for representative Figures 1a, 1c and 1e. The blue boxes denote regions of interest shown in the representative figures.

**Figure 1a:** Blots were first probed for pERK and then probed for ERK and, subsequently,  $\alpha$ -Tubulin loading control on the same blot. ERK and  $\alpha$ -tubulin are shown on the same blot given their similar size, with  $\alpha$ -Tubulin bands shown above ERK bands. **Figure 1c:** Blots were first probed for pEGFR and pERK and then respectively probed for EGFR and ERK.  $\alpha$ -Tubulin loading control was probed last.

Figure 2

Sos1

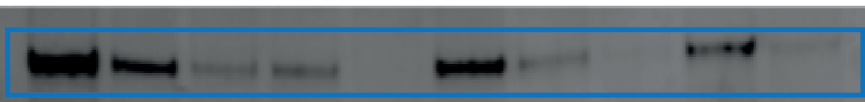

RFP

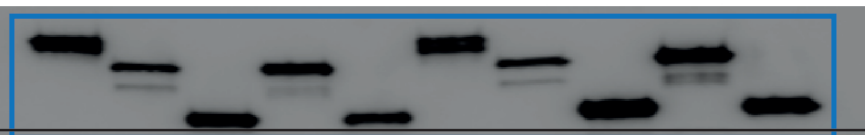

Figure 3b

Sos

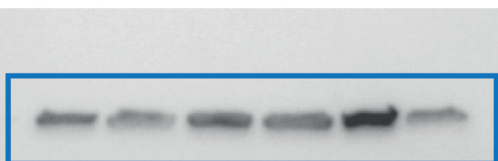

E-Cadherin

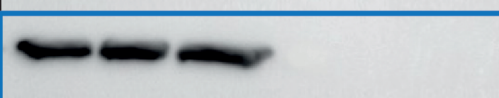

$\beta$ -actin

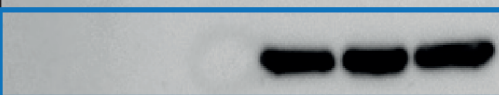

Figure 4

anti-hnRNPC

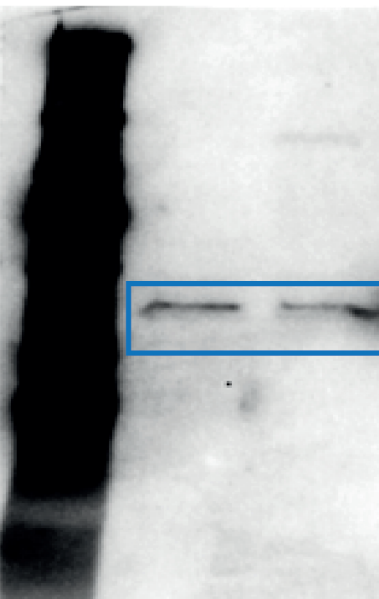

anti-hnRNPC

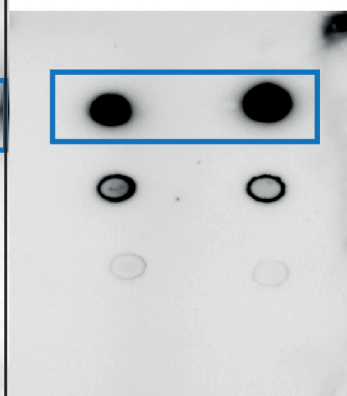

Figure 3a

Sos1

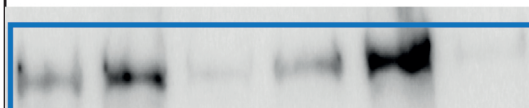

RFP-Grb2 / RFP

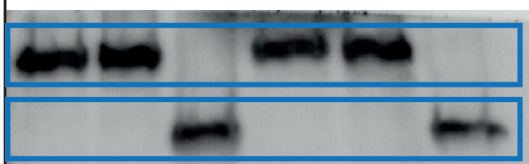

Strep Grb3-3

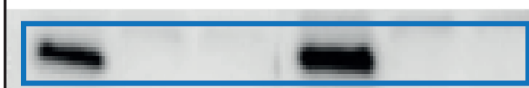

Extended Data Figure 1

Grb2

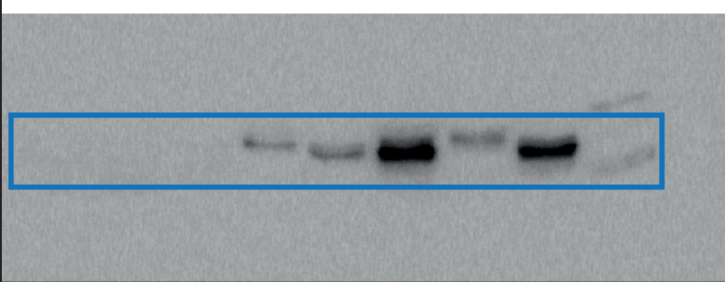

Grb3-3

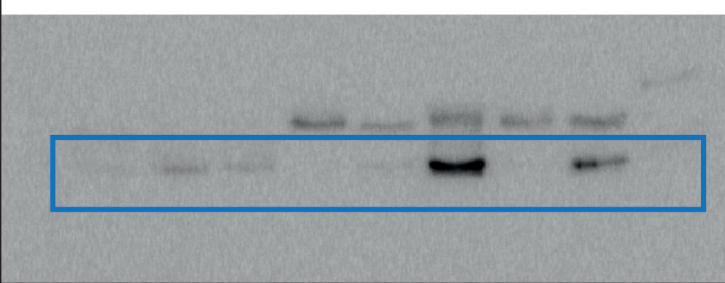

GST

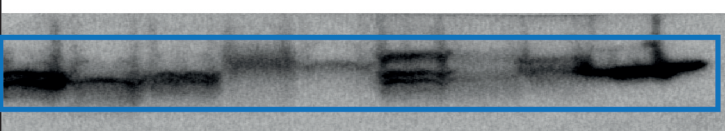

**Supplementary Figure 5: Uncropped and unprocessed Western blots for Figures 2, 3 and 4, as well as Supplementary Figure 1**

Uncropped Western blots shown for representative **Figures 2, 3, 4** and **Supplementary Figure 1**. Blue boxes denote regions of interest shown in the representative figure.

| Sos domain                   | Peptide name | Sequence                                                                            |
|------------------------------|--------------|-------------------------------------------------------------------------------------|
| PH                           | Sos-PH-1     | MICCKSNHGQ <b>PRLP</b> GASNAEYRLK                                                   |
| CDC25                        | Sos-CDC25-2  | DHYKKYLAKLRSINP <b>PCVP</b> FFGIYLTNILKTE                                           |
|                              | Sos-CDC25-3  | TDYLFNKSLEIEPRNPKPL <b>PRFPKK</b> YSYPLKSPGVRPSNP<br>RPGTMRHPTPLQQEP                |
|                              | Sos-CDC25-4  | ESETESTASA <b>PNSPRTPLTPP</b> ASGASSTTDVCSVFDSDH<br>SSPFHSSNDTVFIQVTLPHGPRSASVSSISL |
| Proline-rich C-terminus tail | Sos-CTail-5  | TKGTDEVPV <b>PPVPPRRR</b> ESAPAESSPSKIM                                             |
|                              | Sos-CTail-6  | SKHLDS <b>PPAIPPRQT</b> SKAYSPRYSISDRTSISDPPESPPL<br>LPPREPVRTPDVFSSSP              |
|                              | Sos-CTail-7  | LHLQPPPLGKKSDHGNAFF <b>PNSPSPFTPPPQTP</b> SPHGT<br>RRHLPSPLTQEVDLHSI                |
|                              | Sos-CTail-8  | EVDLHSIAG <b>PPVPPR</b> QSTSQH <b>PKLPPK</b> TYKREHTHPSMH                           |

**Supplementary Table 1: Amino acid sequences of Sos proline-rich peptides by the domain from which they are isolated.** Proline-rich motifs are highlighted in red and by bold, underling type face. NB. Peptide Sos-CTail-8 contains two PXXP motifs. However, the proximity of these means that they are unlikely to sustain two individual SH3 domain binding sites.

| Splicing factor  | Recognised sequence                                | Sequence position                                      |
|------------------|----------------------------------------------------|--------------------------------------------------------|
| ELAVL1           | UUUUU                                              | 5-9 or 6-10                                            |
| HNRNP C          | UUUUU(U)<br>UUUUUG                                 | 5- 9 or 10<br>6-10                                     |
| KHDRBS1          | UUUUUU<br>(CA)AAAU                                 | 5-10<br>13-18 or 15-18                                 |
| HNRNP G          | AAAAU<br>AUCCCC                                    | 14-18<br>17-22                                         |
| KHDRBS3          | AAAU                                               | 15-18 or 39-42                                         |
| HNRNP E2         | UCCCA                                              | 18-23                                                  |
| SRSF9            | AGGCA                                              | 30-34                                                  |
| SRSF2            | AGAAG                                              | 34-38                                                  |
| SRSF10           | (G)AAGAA                                           | 35-40 or 36-40                                         |
| Tra2alpha        | AAGAA                                              | 36-40                                                  |
| HNRNP A1         | CUUAG                                              | 44-48                                                  |
| ELAVL2           | CUUUC                                              | 70-74                                                  |
| TIA-1            | CUUUC                                              | 70-74                                                  |
| MBNL1            | AUGCUU<br>GCGCUC                                   | 41-46<br>93-98                                         |
| HNRNP F          | UGGGG<br>GGGGC<br>UGGGG<br>GGGGA                   | 64-68<br>65-69<br>100-104<br>101-105                   |
| HNRNP H1, H2, H3 | AAGAA<br>UGGGG<br>GGGGC<br>AGAGA<br>UGGGG<br>GGGGA | 36-40<br>64-68<br>65-69<br>82-86<br>100-104<br>101-105 |
| HNRNP I          | CUUUCUU<br>CUCUCU<br>UCUCU                         | 70-76<br>113-118<br>114-118                            |
| SRSF5            | ACAGC                                              | 52-56                                                  |

**Supplementary Table 2: Splicing factors predicted via *in silico* analysis to bind to sequences located within *GRB2* exon 4 using SpliceAid2.** Around half of the identified proteins are constituents of the hnRNP family. SR proteins are also strongly represented.

| <i>In-silico</i> prediction |                                             | Experimental validation<br>(number of peptides) |                     |                      |
|-----------------------------|---------------------------------------------|-------------------------------------------------|---------------------|----------------------|
| Splicing factor             | RNA oligonucleotide containing binding site | Oligo 1<br>(1-50)                               | Oligo 2<br>(53-103) | Oligo 3<br>(104-123) |
| ELAVL1                      | Oligo1                                      | 11                                              | 5                   | 3                    |
| HNRNP C                     | Oligo 1                                     | 10                                              | 0                   | 1                    |
| KHDRBS1                     | Oligo 1                                     | 2                                               | 0                   | 1                    |
| HNRNP G                     | Oligo 1                                     | 8                                               | 0                   | 7                    |
| KHDRBS3                     | Oligo 1                                     | 0                                               | 0                   | 0                    |
| HNRNP E2                    | Oligo 1                                     | 9                                               | 12                  | 4                    |
| SRSF9                       | Oligo1                                      | 0                                               | 4                   | 12                   |
| SRSF2                       | Oligo1                                      | 4                                               | 4                   | 4                    |
| SRSF10                      | Oligo1                                      | 0                                               | 5                   | 0                    |
| Tra2alpha                   | Oligo1                                      | 0                                               | 3                   | 3                    |
| HNRNP A1                    | Oligo1                                      | 24                                              | 19                  | 32                   |
| ELAVL2                      | Oligo2                                      | 0                                               | 0                   | 0                    |
| TIA-1                       | Oligo2                                      | 13                                              | 2                   | 3                    |
| MBNL1                       | Oligo1& 2                                   | 0                                               | 0                   | 0                    |
| HNRNP F                     | Oligo2                                      | 6                                               | 0                   | 4                    |
| HNRNPH1                     | Oligo1& 2                                   | 18                                              | 1                   | 16                   |
| HNRNPH2                     | Oligo1& 2                                   | 11                                              | 1                   | 8                    |
| HNRNPH3                     | Oligo1& 2                                   | 4                                               | 0                   | 2                    |
| HNRNP I                     | Oligo 2 & 3                                 | 29                                              | 11                  | 7                    |
| SRSF5                       | Oligo 2                                     | 2                                               | 0                   | 2                    |

**Supplementary Table 3: Experimental validation of proteins binding to *GRB2* exon 4.** Splicing factors predicted to bind to exon 4 of *GRB2* by SpliceAid2 are shown, as are the RNA oligonucleotide that contain the consensus binding site for each predicted splicing factor. The number of peptides corresponding to each protein that

were identified by mass spectrometry analysis of each RNA oligonucleotide is shown.

Only proteins with two or more matching peptides were considered to have bound.

| Oligo/SpliceAid                       | hnRNP/SR proteins |                                                                                          |
|---------------------------------------|-------------------|------------------------------------------------------------------------------------------|
|                                       | Number            | Names                                                                                    |
| Oligo1, Oligo2,<br>Oligo3, SpliceAid2 | 2                 | SRSF2, hnRNPA1                                                                           |
| Oligo1, Oligo2,<br>Oligo3             | 10                | hnRNPL, hnRNPK, hnRNPO, hnRNPU, hnRNPA2B1, hnRNPA3,<br>hnRNPR, hnRNPAO, hnRNPAAB, hnRNPD |
| Oligo1, Oligo3,<br>SpliceAid2         | 3                 | hnRNPH1, hnRNPF, hnRNPH2                                                                 |
| Oligo2, Oligo3,<br>SpliceAid2         | 1                 | SRSF9                                                                                    |
| Oligo1, Oligo3                        | 8                 | hnRNPM, SRSF3, hnRNPD, hnRNPU, SRSF4, SRSF7, SRSF1, SRSF6                                |
| Oligo1, SpliceAid2                    | 3                 | hnRNPC, SRSF5, hnRNPH3                                                                   |
| Oligo2, SpliceAid2                    | 1                 | SRSF10                                                                                   |
| Oligo1                                | 2                 | hnRNPU2, hnRNPL                                                                          |
| Oligo2                                | 3                 | hnRNP H, hnRNPD0, SRSF7                                                                  |
| SpliceAid2                            | 3                 | hnRNPE2, hnRNPI, hnRNPG                                                                  |

**Supplementary Table 4:** A list of hnRNP/SR proteins identified by mass spectrometry (Oligo1, Oligo2, Oligo3) and predicted to bind by SpliceAid2.



| <b>Output type</b>                                | <b>Output</b>     |
|---------------------------------------------------|-------------------|
| rMATS ID                                          | 27123             |
| Gene ID                                           | ENSG00000177885.9 |
| Gene Name                                         | GRB2              |
| Chromosome                                        | 17                |
| Gene Strand                                       | -                 |
| Exon Start                                        | 73321978          |
| Exon End                                          | 73322101          |
| Upstream Exon Start                               | 73317875          |
| Upstream Exon End                                 | 73317908          |
| Downstream Exon Start                             | 73328780          |
| Upstream Exon End                                 | 73328878          |
| Inclusion Counts hnRNPC shRNA                     | 198, 190          |
| Skipping Counts hnRNPC shRNA                      | 1, 5              |
| Inclusion Counts Control                          | 291, 364          |
| Skipping Counts Control                           | 0, 0              |
| Length of Inclusion Form (used for normalisation) | 197               |
| Length of Skipping Form (used for normalisation)  | 99                |
| P Value                                           | 0.008984227       |
| False Discovery Rate (calculated from P value)    | 0.108942659       |
| Inclusion Level for Sample 1                      | 0.99, 0.95        |
| Inclusion Level for Sample 2                      | 1.0, 1.0          |
| Inclusion Level Difference                        | -0.03             |

**Supplementary Table 5:** rMATs analysis of significantly different splicing events for hnRNPC knockdown and control experiments.
