# Supplementary material for: The Grb2 splice variant, Grb3-3, is a negative regulator of RAS activation
Source: PubMed Central journal article supplement (PMC9519967; doi:10.1038/s42003-022-03985-7), 2022-09-28
Supplement: 42003_2022_3985_MOESM3_ESM.pdf [file 42003_2022_3985_MOESM3_ESM.pdf]

## Description of Additional Supplementary Files

**File name:** Supplementary Data 1

**Description:** Mass spectral raw data.

**File name:** Supplementary Data 2

**Description:** Identification Numbers of Newly Generated Plasmids – Deposited in Addgene Database.

**File name:** Supplementary Data 3

**Description:** All raw data used to generate graphs for Fig. 1b, Fig. 1d.i, 1d.ii, Fig. 1e, Fig. 1f, Fig. 3e, Fig. 3g, Fig. 4d, Fig. 4e.
